# Supplementary material
Source: PubMed Central journal article supplement (PMC4739666)
Supplement: 10.1074_M115.051516_mcp.M115.051516-2.pdf [file 10.1074_M115.051516_mcp.M115.051516-2.pdf]

Supplemental Table 1: MS/MS peptide identification for alpha tubulin and voltage-dependent anion-selective channel 2. Raw data were searched with the Sequest node of Proteome Discover 1.4, using the uniprot\_ref\_mouse database. Variable modifications of methionine oxidation (M<sup>OX</sup>), proline oxidation (P<sup>OX</sup>), cysteine pyridylethylation (C<sup>PE</sup>) and cysteine succination (C<sup>2SC</sup>) were considered.

| Swiss-Prot Accession # | Protein Identity       | % Coverage | Peptides Identified                                        | PSMs | M+ (Da)    | Charge |
|------------------------|------------------------|------------|------------------------------------------------------------|------|------------|--------|
| P68368                 | Tubulin alpha-4A chain | 64.06      | RAFVHWYVGEGM <sup>OX</sup> EEGEFSEAR                       | 4    | 2502.13694 | 3      |
|                        |                        |            | AVC <sup>PE</sup> MLSNTTAIAEAWAR                           | 4    | 1912.94756 | 2      |
|                        |                        |            | AVC <sup>PE</sup> M <sup>OX</sup> LSNTTAIAEAWAR            | 6    | 1928.93364 | 2      |
|                        |                        |            | AYHEQLSVAEITNAC <sup>PE</sup> FEPANQMVK                    | 9    | 2798.34463 | 4      |
|                        |                        |            | AYHEQLSVAEITNAC <sup>PE</sup> FEP <sup>OX</sup> ANQMVK     | 18   | 2814.34062 | 2      |
|                        |                        |            | QLFHPEQLITGKEDAANNYAR                                      | 15   | 2415.22353 | 4      |
|                        |                        |            | AFVHWYVGEGMEEGEFSEAREDMAALEK                               | 20   | 3217.45107 | 4      |
|                        |                        |            | AFVHWYVGEGM <sup>OX</sup> EEGEFSEAREDMAALEK                | 22   | 3233.44863 | 4      |
|                        |                        |            | AFVHWYVGEGM <sup>OX</sup> EEGEFSEAREDM <sup>OX</sup> AALEK | 7    | 3249.43813 | 4      |
|                        |                        |            | LISQIVSSITASLR                                             | 54   | 1487.88874 | 3      |
|                        |                        |            | AVFVDLEPTVIDEIR                                            | 7    | 1715.93387 | 3      |
|                        |                        |            | FDGALNVDLTFQTNLVPYPR                                       | 55   | 2409.22647 | 3      |
|                        |                        |            | TIGGGDDSF <sup>PE</sup> ETGAGK                             | 5    | 2115.94512 | 2      |
|                        |                        |            | RNLDIRPTYTNLNR                                             | 15   | 1874.99306 | 4      |
|                        |                        |            | DVNAAIAAIK                                                 | 3    | 985.57237  | 2      |
|                        |                        |            | IHFPLATYAPVISA EK                                          | 16   | 1756.97991 | 2      |
|                        |                        |            | SIQFVDWC <sup>PE</sup> PTGFK                               | 2    | 1632.79997 | 2      |
|                        |                        |            | LDHKFDLMYAK                                                | 10   | 1380.70647 | 2      |
|                        |                        |            | LDHKFDLM <sup>OX</sup> YAK                                 | 12   | 1396.70098 | 2      |
|                        |                        |            | LSVDYGKK                                                   | 9    | 909.50780  | 2      |
|                        |                        |            | EIIDPVLDR                                                  | 3    | 1069.59599 | 2      |
|                        |                        |            | VGINYQPPTVVPGGDLAK                                         | 29   | 1824.99455 | 2      |
|                        |                        |            | GHYTIGK                                                    | 13   | 775.41216  | 2      |
|                        |                        |            | YMAC <sup>PE</sup> C <sup>PE</sup> LLYR                    | 8    | 1345.63249 | 2      |
|                        |                        |            | YM <sup>OX</sup> AC <sup>PE</sup> C <sup>PE</sup> LLYR     | 7    | 1361.62883 | 2      |
|                        |                        |            | GDVVPK                                                     | 6    | 614.35112  | 2      |
|                        |                        |            | HVPR                                                       | 3    | 508.30171  | 2      |

|        |                                                              |       |                          |    |            |   |
|--------|--------------------------------------------------------------|-------|--------------------------|----|------------|---|
| G3UX26 | Voltage-dependent anion-selective channel protein 2 (VDAC 2) | 50.88 | YQLDPTASISAK             | 3  | 1293.66265 | 2 |
|        |                                                              |       | LTFDFFFSPNTGKK           | 6  | 1556.78325 | 2 |
|        |                                                              |       | VNNSSLIGVGYTQTLRPGVK     | 10 | 2103.14580 | 2 |
|        |                                                              |       | TGDFQLHTNVNNGTEFGGSLYQK  | 1  | 2527.16764 | 3 |
|        |                                                              |       | WNTDNTLGTEIAIEDQICPEQGLK | 1  | 2567.24631 | 3 |
|        |                                                              |       | VSGTLETK                 | 2  | 834.45195  | 2 |
|        |                                                              |       | SNFAVGYR                 | 2  | 913.44621  | 3 |
|        |                                                              |       | SFNAGGHK                 | 5  | 817.39092  | 3 |
|        |                                                              |       | FGIAAK                   | 3  | 606.35832  | 3 |
|        |                                                              |       | DIFNK                    | 1  | 636.33269  | 2 |
|        |                                                              |       | LTLSALVDGK               | 2  | 1016.59844 | 2 |
|        |                                                              |       | GFGFGLVK                 | 3  | 824.46269  | 2 |

---

Supplemental Table 2: MS/MS peptide identification for voltage-dependent anion-selective channels 1 and 2 spots. Raw data were searched with the Sequest HT node of Proteome Discover 1.4 (SP1), using the uniprot\_ref\_mouse database.

| Swiss-Prot Accession # | Protein Identity                                             | % Coverage | Peptides Identified     | PSMs | M+ (Da)    | Charge |
|------------------------|--------------------------------------------------------------|------------|-------------------------|------|------------|--------|
| Q60932                 | Voltage-dependent anion-selective channel protein 1 (VDAC 1) | 55.74      | LTFDSSFSPNTGKK          | 75   | 1528.77349 | 2      |
|                        |                                                              |            | TKSENGLEFTSSGSANTETTK   | 75   | 2189.02787 | 3      |
|                        |                                                              |            | VNSSLIGLGYTQTLKPGIK     | 418  | 2103.18559 | 2      |
|                        |                                                              |            | SRVTQSNFAVGKY           | 194  | 1456.75847 | 2      |
|                        |                                                              |            | WNTDNTLGTEITVEDQLAR     | 4    | 2176.06182 | 2      |
|                        |                                                              |            | WTEYGLTFTEK             | 48   | 1374.66203 | 2      |
|                        |                                                              |            | GYGFGLIK                | 39   | 854.47923  | 2      |
|                        |                                                              |            | KLETAVNLAWTAGNSNTR      | 4    | 1946.01889 | 3      |
|                        |                                                              |            | LTLSALLDGKNVNAGGHK      | 143  | 1808.00882 | 3      |
|                        |                                                              |            | TDEFQLHTNVNDGTEFGGSIYQK | 9    | 2600.19815 | 3      |
| Q60930                 | Voltage-dependent anion-selective channel protein 2 (VDAC 2) | 21.69      | GFGFGLVK                | 19   | 824.46825  | 2      |
|                        |                                                              |            | LTFDSSFSPNTGKK          | 86   | 1556.80364 | 2      |
|                        |                                                              |            | LTLSALVDGK              | 89   | 1016.60130 | 2      |
|                        |                                                              |            | VNSSLIGVGYTQTLRPGVK     | 89   | 2103.16167 | 2      |
|                        |                                                              |            | YQLDPTASISAK            | 75   | 1293.67204 | 2      |
